# Supplementary material
Source: PubMed Central journal article supplement (PMC5509027)
Supplement: NIHMS874475-supplement-3.pdf [file NIHMS874475-supplement-3.pdf]

## 1. Supplemental Materials

Supplemental Table 1: Statistical summaries from DGT retraining phases in Experiment 2.

| Retraining Block | Main Effects                     |                                 | Interaction                     |
|------------------|----------------------------------|---------------------------------|---------------------------------|
|                  | Drug                             | Session                         |                                 |
| <i>a-dmCPu</i>   |                                  |                                 |                                 |
| Retraining-1     | <b>F(1,14)=60.52, p&lt;0.001</b> | <b>F(4,56)=5.24, p&lt;0.001</b> | <b>F(4,56)=5.24, p&lt;0.001</b> |
| Retraining-2     | <b>F(1,14)=23.71, p&lt;0.001</b> | F(1,14)=4.27, p=0.05            | <b>F(1,14)=5.86, p&lt;0.05</b>  |
| Retraining-3     | <b>F(1,14)=66.49, p&lt;0.001</b> | F(1,14)=1.09, p=0.31            | <b>F(1,14)=7.91, p&lt;0.05</b>  |
| Retraining-4     | <b>F(1,14)=44.01, p&lt;0.001</b> | F(6,84)=2.88, p=0.05            | F(6,84)=1.30, p=0.28            |
| <i>p-dmCPu</i>   |                                  |                                 |                                 |
| Retraining-1     | <b>F(1,14)=54.38, p&lt;0.001</b> | <b>F(4,56)=5.14, p&lt;0.01</b>  | <b>F(4,56)=5.49, p&lt;0.01</b>  |
| Retraining-2     | <b>F(1,14)=34.94, p&lt;0.001</b> | F(1,14)=2.51, p=0.13            | F(1,14)=0.007, p=0.9            |
| Retraining-3     | <b>F(1,14)=37.45, p&lt;0.001</b> | F(1,14)=1.88, p=0.19            | F(1,14)=3.19, p=0.09            |
| Retraining-4     | <b>F(1,14)=60.22, p&lt;0.001</b> | <b>F(6,84)=8.04, p&lt;0.001</b> | <b>F(6,84)=5.7, p&lt;0.001</b>  |

Significant effects are in bold.

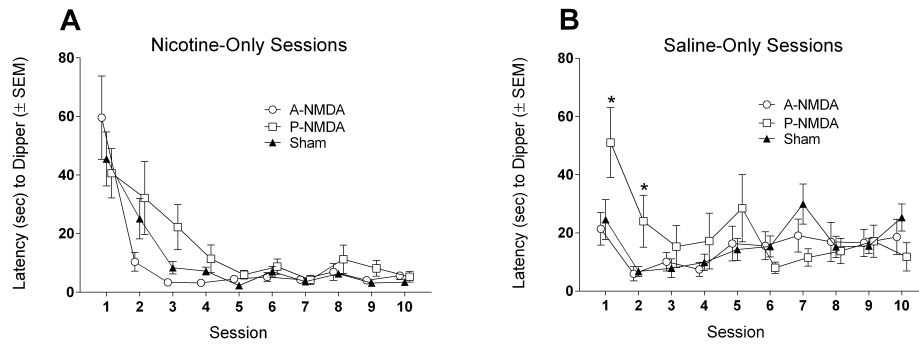

Supplemental Figure 1 : Latency to dipper ( $\pm$ SEM) during nicotine (A) or saline (B) sessions of Experiment 1.\*Denotes significant differences from Sham controls.

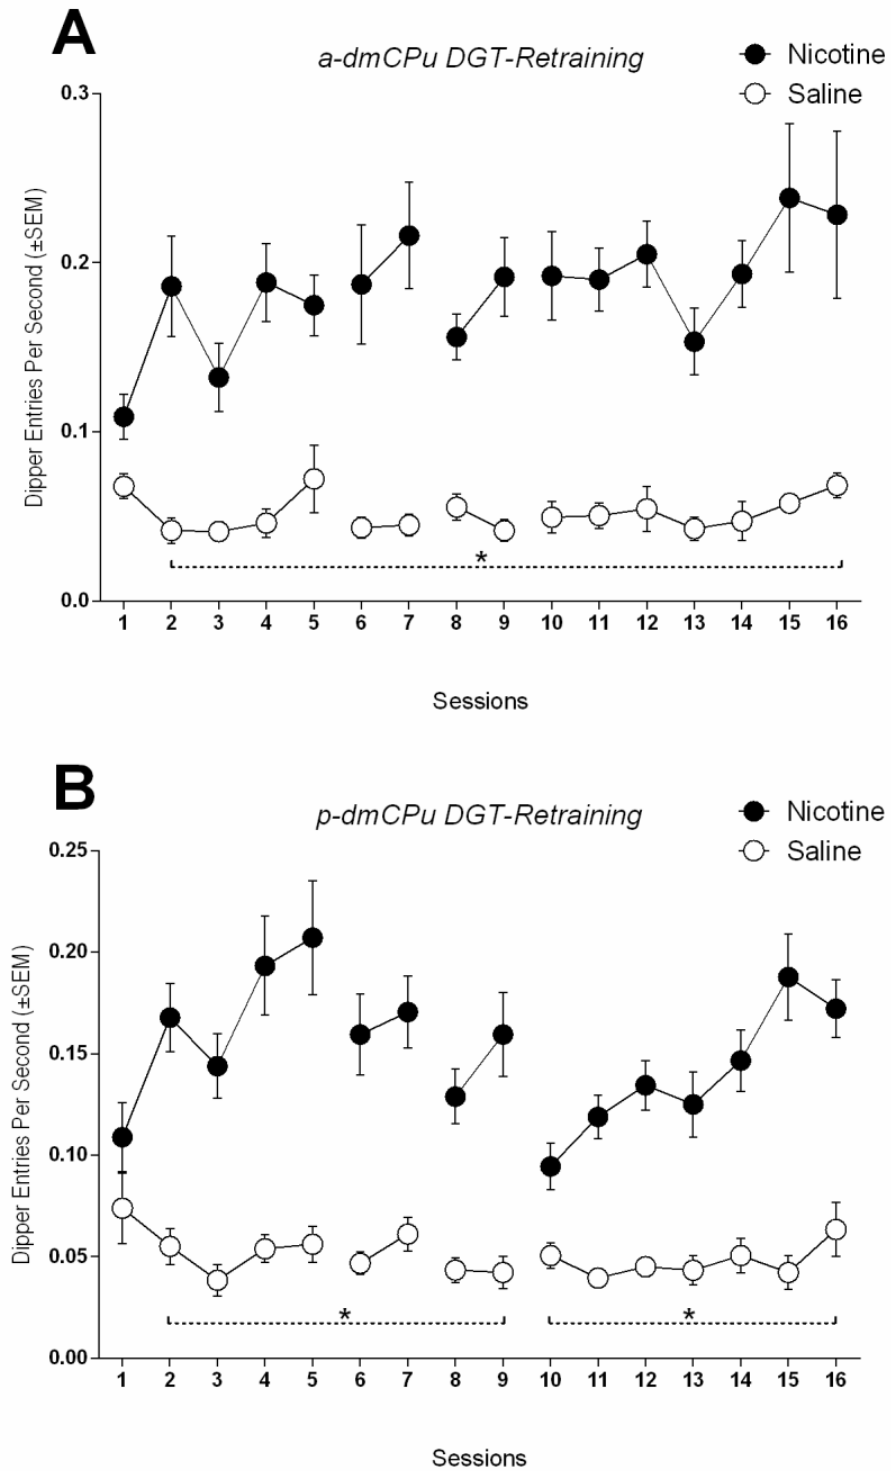

Supplemental Figure 2 : Dipper entry rates ( $\pm$ SEM) during initial training phase (A) and a mean ( $\pm$ SEM) number of total dipper entries during nicotine or saline 4-min test following either distilled water (DW) or lidocaine (Lid) infusion into (A) a-dmCPu or (B) p-dmCPu. \*Denotes significant differences between corresponding data points.
